# Supplementary material
Source: MDPI journal article supplement (https://www.mdpi.com/2079-6412/12/6/763)
Supplement: s1 [file s1]

# Plasmonic Nano Silver: An Efficient Colorimetric Sensor for the Selective Detection of Hg<sup>2+</sup> Ions in Real Samples

Nasir Mahmood Abbasi<sup>1</sup>, Muhammad Usman Hameed<sup>2</sup>, Najma Nasim<sup>3</sup>, Farid Ahmed<sup>4,\*</sup>, Faizah Altaf<sup>3</sup>, Shabnam Shahida<sup>2</sup>, Sana Fayyaz<sup>3</sup>, Syed Mubashar Sabir<sup>2</sup> and Patrizia Bocchetta<sup>5,\*</sup>

<sup>1</sup> College of Engineering and Applied Sciences, Nanjing University, Jiangsu 210093, China; [ab-basichemist786@gmail.com](mailto:ab-basichemist786@gmail.com)

<sup>2</sup> Department of Chemistry, University of Poonch, Rawalakot 12350, Azad Kashmir, Pakistan; [drusmanhamid@upr.edu.pk](mailto:drusmanhamid@upr.edu.pk) (M.U.H.); [shabnamshahida01@gmail.com](mailto:shabnamshahida01@gmail.com) (S.S.); [syedmubashar@upr.edu.pk](mailto:syedmubashar@upr.edu.pk) (S.M.S)

<sup>3</sup> Department of Chemistry, Women University of Azad Jammu&Kashmir Bagh 12500, Pakistan; [najmanasim12@gmail.com](mailto:najmanasim12@gmail.com)(N.N); [faizahaltaf@gmail.com](mailto:faizahaltaf@gmail.com) (F.A.); [sanafayyaz777@gmail.com](mailto:sanafayyaz777@gmail.com)(S.F.)

<sup>4</sup> Institute for Advanced Study Shenzhen University, Shenzhen 518060, China; [farids\\_ahmed@yahoo.com](mailto:farids_ahmed@yahoo.com)

<sup>5</sup> Department of Innovation Engineering, University of Salento, Edificio La Stecca, Via per Monteroni, 73100 Lecce, Italy; [patrizia.bocchetta@unisalento.it](mailto:patrizia.bocchetta@unisalento.it)

\* Correspondence: [farids\\_ahmed@yahoo.com](mailto:farids_ahmed@yahoo.com)(F.A.); [patrizia.bocchetta@unisalento.it](mailto:patrizia.bocchetta@unisalento.it)(P. B.)

## Table Caption

**Table S1.** Comparison of different methods using nanoparticles as a sensing probe for Hg<sup>2+</sup> determination.

| S. No | Technique             | Limit of detection(ppm) | Comments                                    | Reference     |
|-------|-----------------------|-------------------------|---------------------------------------------|---------------|
| 1     | Fluorometric sensing  | 0.2                     | Complicated sensing protocols               | 1             |
| 2     | Microfluidic platform | 0.19                    | Complex synthesis of highly sensitive probe | 2             |
| 3     | Fluorescence          | 0.58                    | Complicated synthesis process               | 3             |
| 4     | Colorimetric Assay    | 0.2                     | Simple, low cost, quick and robust          | Current study |

## References

- Wang, X.; Su, Y.; Yang, H.; Dong, Z.; Ma, J. Highly sensitive fluorescence probe based on chitosan nanoparticle for selective detection of Hg<sup>2+</sup> in water. *Colloids Surf. A Physicochem. Eng. Asp.* **2012**, *402*, 88–93.
- Davadhasan, J.P.; Kim, J. A chemically functionalized paper-based microfluidic platform for multiplex heavy metal detection. *Sens. Actuator B Chem.* **2018**, *10*, 18–24.
- Chen, M.-M.; Chen, L.; Li, H.-X.; Brammer, L.; Lang, J.-P. Highly selective detection of Hg<sup>2+</sup> and MeHgI by di-pyridin-2-yl-[4-(2-pyridin-4-yl-vinyl)-phenyl]-amine and its zinc coordination polymer. *Inorg. Chem. Front.* **2016**, *3*, 1297–1305.
